# Supplementary material for: Systems level analysis of two-component signal transduction systems in Erwinia amylovora: Role in virulence, regulation of amylovoran biosynthesis and swarming motility
Source: PubMed Central journal article supplement (PMC2698875; doi:10.1186/1471-2164-10-245), 2009-05-26
Supplement: 1471-2164-10-245-S1.pdf [file 1471-2164-10-245-S1.pdf]

**Table S1. Comparison and classification of TCSTs in *E. amylovora* and other related enterobacteria**

| <i>E. amylovora</i><br>Ea273                                                        | <i>P. carotovora</i><br>SCRI1043 <sup>a</sup> | <i>D. dadantii</i><br>3937 <sup>a</sup> | <i>E. coli</i> K12 <sup>b</sup> | HK type <sup>c</sup> | RR type <sup>d</sup> |
|-------------------------------------------------------------------------------------|-----------------------------------------------|-----------------------------------------|---------------------------------|----------------------|----------------------|
| <b>Metabolic responses</b>                                                          |                                               |                                         |                                 |                      |                      |
| ArcBA                                                                               | Eca0314-3893                                  | +                                       | +                               | IB hybrid            | OmpR-like            |
| DcuSR                                                                               | Eca4398-4399                                  | +                                       | +                               | II                   | OmpR-like            |
| NarQP                                                                               | Eca1900-1901                                  | --                                      | +                               | III                  | NarL-like            |
| NtrCB                                                                               | Eca0027-0028                                  | +                                       | +                               | IC                   | NtrC-like            |
| <b>Ion/metal responses</b>                                                          |                                               |                                         |                                 |                      |                      |
| BaeSR*                                                                              | Eca3188-3189                                  | +                                       | +                               | IA                   | OmpR-like            |
| KdpDE                                                                               | Eca1338-1339                                  | +                                       | +                               | IA                   | OmpR-like            |
| PhoQP                                                                               | Eca2445-2446                                  | +                                       | +                               | IA                   | OmpR-like            |
| PhoRB                                                                               | Eca1110-1111                                  | +                                       | +                               | IA                   | OmpR-like            |
| PmrBA (BasSR)                                                                       | Eca4044-4045                                  | +                                       | +                               | IA                   | OmpR-like            |
| <b>Stress responses</b>                                                             |                                               |                                         |                                 |                      |                      |
| EnvZ/OmpR                                                                           | Eca4107-4108                                  | +                                       | +                               | IA                   | OmpR-like            |
| CpxA1R1                                                                             | Eca4311-4312                                  | +                                       | +                               | IA                   | OmpR-like            |
| CpxA2R2                                                                             | Eca0889-0890                                  | +                                       | --                              | IA                   | OmpR-like            |
| GrrSA                                                                               | Eca2882-3571                                  | +                                       | +                               | IB hybrid            | NarL-like            |
| RcsCDB                                                                              | Eca1201-03-04                                 | +                                       | +                               | IB hybrid;<br>HPT    | NarL-like            |
| <b>Unknown</b>                                                                      |                                               |                                         |                                 |                      |                      |
| RstBA                                                                               | Eca2012-2013                                  | +                                       | +                               | IA                   | OmpR-like            |
| YfhKA                                                                               | Eca3255-3257                                  | +                                       | +                               | IA                   | NtrC-like            |
| YehUT                                                                               | Eca3353-4152                                  | +                                       | +                               | IV                   | LytR-like            |
| <b>T3SS</b>                                                                         |                                               |                                         |                                 |                      |                      |
| HrpXY                                                                               | Eca2088-2089                                  | +                                       | --                              | III                  | NarL-like            |
| <b>TCSTs not present in <i>E. amylovora</i> but in other related enterobacteria</b> |                                               |                                         |                                 |                      |                      |
| CitAB                                                                               | Eca2577-2578                                  | +                                       | +                               | II                   | NA                   |
| NarXL                                                                               | Eca2028-2029                                  | +                                       | +                               | III                  | NarL-like            |
| UhpBA                                                                               | Eca1496-1497                                  | +                                       | +                               | III                  | NarL-like            |
| YpdAB                                                                               | Eca2431-2432                                  | +                                       | +                               | NA                   | NA                   |
| CusRS                                                                               | --                                            | +                                       | +                               | IA                   | OmpR-like            |
| QseCB                                                                               | Eca0007-0008                                  | --                                      | +                               | NA                   | NA                   |
| One HK/RR                                                                           | Eca0785-0786                                  | --                                      | --                              | NA                   | NA                   |
| 7 HKs/RRs <sup>a</sup>                                                              | --                                            | +                                       | --                              | NA                   | NA                   |
| 5 HKs/RRs <sup>b</sup>                                                              | --                                            | --                                      | +                               | NA                   | NA                   |

<sup>a</sup> Data for *Dickeya dadantii* (*Erwinia chrysanthemi*) 3937 and *Pectobacterium* (*Erwinia*) *carotovora* subsp. *atroseptica* SCRI1043 see Yap *et al.*, 2008. Seven HKs and RRs only in *D. dadantii* are TctE/D; ABF-0016854/16853; 19562/46568/14657; 15830/15831; 15809/15810; 16068/16069; 14915/14914. Two sets of CheABRWYZ exist in *E. amylovora*, but only one set in other related enterobacteria. +: present; ---: absent.

<sup>b</sup> Data for *E. coli* K12 see Kim and Forst, 2001. Five HKs and RRs only in *E. coli* are AtoS/C; TorS/R; CopS/R; EvgS/A and CreC/B. +: present; ---: absent.

<sup>cd</sup> HK families see Kim and Forst, 2001. RRs see Galperin, 2006. NA: not analyzed.

**Table S2. Primers used in this study**

| Primer | Sequences (5'—3') <sup>a</sup>                                               |
|--------|------------------------------------------------------------------------------|
| B0089F | GTGTCCCCCTGGTGCCTTCGAAAGTCGCCTGTATAAGGACGTTTACCGG<br>GCGATTGTGTAGGCTGGAGCT   |
| B0089R | TCAGCGCTCTTCCAGCCGGTAACCCACGCCGCTACCGTTTTAATCCGAT<br>ATTCCGGGGATCCGTCGACC    |
| B0090F | ATGAACAGTATGCGCAGGCGTTTGCTGGTGATGCTGGCGCTGATCGTGCT<br>GCGATTGTGTAGGCTGGAGCT  |
| B0090R | CTAACCCAGCTGCTTTGGCAGCCAGCAGCAGACATCCAGGCCACAGCAAT<br>ATTCCGGGGATCCGTCGACC   |
| B0117F | ATGAAGCAAATTCGTTTGTAGCGCAGTACTACGTTGATTTAATGGTAAA<br>GCGATTGTGTAGGCTGGAGCT   |
| B0117R | TCATTTTTTTTCAGCGTCTGTTACCCATTGCCGTA AAACTTCCATATCAT<br>ATTCCGGGGATCCGTCGACC  |
| B0270F | ATGAGGCGGCTCCGCTTCTCTCCCCGTAGTTCATTTGCGCGTACGCTGTT<br>GCGATTGTGTAGGCTGGAGCT  |
| B0270R | TTATGCCACCGGGCCGGCCGCAAGCTGGCTGGCGGCAGCGGCAGATAAG<br>ATTCCGGGGATCCGTCGACC    |
| B0271F | ATGAAAGATAAGCTGCTGTTTAATATGCTTTGTAACAATTTCCGGCTACAA<br>GCGATTGTGTAGGCTGGAGCT |
| B0271R | TCATGCTTTGCTGCCGTCCGGGACAAAGACATAACCCAAACCCAGACGG<br>ATTCCGGGGATCCGTCGACC    |
| B0355F | TTGCAAGCATTGTAAAGCCGAAGCATGAACGTATCTGGCTGGTGGCATC<br>GCGATTGTGTAGGCTGGAGCT   |
| B0355R | CTAAGCATTCTGCTGATCTTTCCACTGCATCAGCGCAGCGCTCGACATGG<br>ATTCCGGGGATCCGTCGACC   |
| B0414F | ATGAACGACGAACTCCAGCGCCCCAATCCGGATGCGCTGCTACGCCAGGC<br>GCGATTGTGTAGGCTGGAGCT  |
| B0414R | CTACATTGGCGTGTAATCTTCCAACAGCGGTGGTGCCGTTAGCGGCAGAG<br>ATTCCGGGGATCCGTCGACC   |
| B0686F | ATGATATCCAGCCTGACCACCCGTATCTTTGCCATCTTCTGGCTTACTTT<br>GCGATTGTGTAGGCTGGAGCT  |
| B0686R | TTATTGCTGTGAGTGGTATACAGCGGCAGCCATATTGTCAGGCGCAAAC<br>ATTCCGGGGATCCGTCGACC    |
| B0687F | ATGAATAAGATCTTATTGGTTGACGACGACCGCAATTGACTTCGCTACT<br>GCGATTGTGTAGGCTGGAGCT   |
| B0687R | TCATGTTGCCGATACCATCAGGTATCCCCGGCCTCGCAAGGTTTTAAACC<br>ATTCCGGGGATCCGTCGACC   |
| B0955F | ATGAATGAAGACTCAGATGTTGTGTACCAGCTTTTGGCAAGAAGCGAGGG<br>GCGATTGTGTAGGCTGGAGCT  |
| B0955R | CTAAAATTCTTTGAGGCGGCGCTCCGGCGGCTGCGGGCGGCCAAAATAAT<br>ATTCCGGGGATCCGTCGACC   |
| B1215F | ATGAATTTGCAAAGCTACGATGAGTTACTGGACAGCAAGCAACGGCTGTC<br>GCGATTGTGTAGGCTGGAGCT  |
| B1215R | TTATACGATATCTGCAGGTTTACCGAGCGGCATTTTTGCCGCGTCCTGAA<br>ATTCCGGGGATCCGTCGACC   |
| B1250F | ATGTCACATCAGGATAACAGCCAGGGGATGCCGAATGCATTACCGGTTGG<br>GCGATTGTGTAGGCTGGAGCT  |
| B1250R | TTAGCTTTGCGGATTTAACAACCACGCACCTTCATGTTTCGATGGTGATGG<br>ATTCCGGGGATCCGTCGACC  |
| B1306F | GTGACCTCCATATTGGGTGCCAGGCCGTTGTTGAAGGTACAGGGATGCCG<br>GCGATTGTGTAGGCTGGAGCT  |
| B1306R | TCAGTCCTGTAATTCACCACAGAAACGGTAACCTTCGCCGTGAATGGTGG<br>ATTCCGGGGATCCGTCGACC   |

B1675F ATGGCAAAGCGCATTCTTGTGGTCTGAAGATGAAGCCCCAATCCGTGAGAT  
GCGATTGTGTAGGCTGGAGCT  
B1675R TCAATAACGTGCAGAGAAACGATAACCTGTTCCGCGAACCGTCTGCACCA  
ATTCCGGGGATCCGTCGACC  
B1676F GTGTTGGAACGCCTCTCTGGAAGAGATTACTGTTTGAGCTGCTGCTTGC  
GCGATTGTGTAGGCTGGAGCT  
B1676R TTAAGGCCGCATGCAGCCGCCGGTTCAGCACCCACAATCATCTGAGCG  
ATTCCGGGGATCCGTCGACC  
B1912F TTGACCGACCGGCGAGGTATTGTGACCACCATTTTGATTGTTGAAGATGA  
GCGATTGTGTAGGCTGGAGCT  
B1912R TTATGGCATAAAGCGATATCCAACGCCGGTTCGGTGAGAAGATGCTGCG  
ATTCCGGGGATCCGTCGACC  
B2074F ATGCATATGGTTTCACTGGTCGCCGGATCTCGACGTGCTACGACGTTG  
GCGATTGTGTAGGCTGGAGCT  
B2074R TTAATGCAGCAGGGAATGGTGGTTATCATTGGAGGTCGTTCTTCATCTT  
ATTCCGGGGATCCGTCGACC  
B2194F TTGATGACATCTGAAAACATTTTCATTTGGCGAGCAGATATCAAATCAGC  
GCGATTGTGTAGGCTGGAGCT  
B2194R TCAGATTA AACCGATTGCTGCTGCATAGGAGGCAATTTGAGTTTTGTTAG  
ATTCCGGGGATCCGTCGACC  
B2195F TTGCAAGGTGGTTGTCTAACCTGCGCCCAAAGTCATACAGCTGCTCAAAC  
GCGATTGTGTAGGCTGGAGCT  
B2195R TTAATCTTTATGGCGTCCACGCAGCCCAAATTTGGCGGAGACGCCGAATG  
ATTCCGGGGATCCGTCGACC  
B2198F TTGATTAGCGTTTTTCTTGTGATGACCATGAGCTGGTGCGCGCAGGTAT  
GCGATTGTGTAGGCTGGAGCT  
B2198R TTAATCTTTATGGCGTCCACGCAGCCCAAATTTGGCGGAGACGCCGAATG  
ATTCCGGGGATCCGTCGACC  
B2323F ATGTGTAATTCACGTTTTTCGCCGTATAAAAACCCTTTTTCGTTACGCATCCG  
GCGATTGTGTAGGCTGGAGCT  
B2323R TTAATCTTTATGGCGTCCACGCAGCCCAAATTTGGCGGAGACGCCGAATG  
ATTCCGGGGATCCGTCGACC  
B2324F ATGCGTGTGTAGTTGTGGAAGATAATCCACTGCTGCGTCATCATTGGC  
GCGATTGTGTAGGCTGGAGCT  
B2324R TCAGAGATCGAAGCGGTAACCCTGACCGCGCACCGTAGTGATCACTTCCT  
ATTCCGGGGATCCGTCGACC  
B2361F ATGATCAATGTTTTAATCGTCGATGATGATGCGATGGTGGCAGAACTTAA  
GCGATTGTGTAGGCTGGAGCT  
B2361R TCACTGGCAGAACCGCTTAAGCAGAATGCTGCGTTCTGCCTGAAGACGGT  
ATTCCGGGGATCCGTCGACC  
B2362F TTGCCTGCCCCATTGCGCGCTACAGGAGTCAATATTGAAACGGCTCAGCC  
GCGATTGTGTAGGCTGGAGCT  
B2362R TCATGCTTTTTTGAGCTCTCCATCCCAGGGCAGTTGTACAAAAAATTGCG  
ATTCCGGGGATCCGTCGACC  
B2651F TTGCTAACCCATATATTTGGTTCTATGAACAAAATTGTATTCGTTGAAGA  
GCGATTGTGTAGGCTGGAGCT  
B2651R TCATGACGCATCCCAGGCATGAGGGGCAAACAGGTAGCCCTTGTCTTCTGA  
ATTCCGGGGATCCGTCGACC  
B2662F ATGAGGAAGCTGTTTGTCCAGTTTTACCTGCTGCTGTTTCGTTTCTTCT  
GCGATTGTGTAGGCTGGAGCT  
B2662R TTAGTTGAGCGCAGCAGGCCAGCAAAAACGTATGCTGGCACCGCCAGTG  
ATTCCGGGGATCCGTCGACC  
B2946F ATGGGTACATCAGAATACTCAAACAAATTTACGACATCAATTTGTCTTA  
GCGATTGTGTAGGCTGGAGCT  
B2946R TTAGCTGGCTGCCCTTTTTTTCGGCGTCTCTTGTTCCTTTCGTCACGTTAC  
ATTCCGGGGATCCGTCGACC

B2986F GTGAACGATCTGTATACCGCCAATGGCGTGATGGACAAACATTCGCTGTG  
GCGATTGTGTAGGCTGGAGCT  
B2986R TCAGCGCGCTCCCGATAACCTGGCGCGCAGGCGTTTTATCGCCTGACTGT  
ATTCCGGGGATCCGTCGACC  
B3113F ATGTCGACAGATAAATTCAAGACCGTTGCTGCAACTGCGCTCGCTCTGTCT  
GCGATTGTGTAGGCTGGAGCT  
B3113R TCAGTACACGGAAAGCCGACCGCGCCCGCTGTGTTTGGCGTGATAACAGG  
ATTCCGGGGATCCGTCGACC  
B3119F ATGTTGGCAAAAATCCGTATCGGCATTACCGCCAAGCTGTTCCGCCCAT  
GCGATTGTGTAGGCTGGAGCT  
B3119R TCAATGTGCCTGATACGGTAAAGTGTATCGTAATTCTCACGCCTCCGGCAG  
ATTCCGGGGATCCGTCGACC  
B3120F TTGACCCGGGCTGACGAAATGAACCAGATCCCCGCCACTCCACTGATTTT  
GCGATTGTGTAGGCTGGAGCT  
B3120R CTAGATCAGACGACAGCCATCTGCTTCCCAGCGATAGCCGATGCCGTACA  
ATTCCGGGGATCCGTCGACC  
B3205F ATGTTGCCATATAAATTTCCGCTAACTTCCGGCAATGTAACACGATTTTT  
GCGATTGTGTAGGCTGGAGCT  
B3205R TTATTGGTTACCTTGCTGCAGGAGATCTTTGACATAAGTGTCAACTTCAC  
ATTCCGGGGATCCGTCGACC  
B3206F GTGAAGTTGACACTTATGTCAAAGATCTCCTGCAGCAAGGTAACCAATAA  
GCGATTGTGTAGGCTGGAGCT  
B3206R TTATTTATCTACCGCGTCATGCTTACTGATGACAGGTAGTTAAGCAAAG  
ATTCCGGGGATCCGTCGACC  
B3207F ATGGCCGGGATAACTGGCTTTTTCTGCCTCCCGGCGCTACTGTATCGGCA  
GCGATTGTGTAGGCTGGAGCT  
B3207R TTACCGCAACCTGTTACTTAGCGCTTCCCGGCTCTTTCTTACCCGCCCG  
ATTCCGGGGATCCGTCGACC  
B3324F TTGACGACGATGATGGACAAAAAACAACAACCTGGAAAAAGTCCACGA  
GCGATTGTGTAGGCTGGAGCT  
B3324R TCAGTCTTTGAAAAATAGGTTATTCAAGAGAATGGAAGAGATAATAAAGG  
ATTCCGGGGATCCGTCGACC  
B3327F ATGAAAAGAACCTATCTGTATGTCGTTATCCTTGCACTTGTTTTTACAGT  
GCGATTGTGTAGGCTGGAGCT  
B3327R CTATGCAGGTTCTACAGCAACGCGCACCAGGAATGTTGACCCCATATTCA  
ATTCCGGGGATCCGTCGACC  
B3367F ATGAAATCGGGCTTACGTGGCTTCTGTTCTGGAAGATCCTGCTGGGATT  
GCGATTGTGTAGGCTGGAGCT  
B3367R TCAACCGCCCGACTCAATCTCCCAGTGCGGCAGACGAATTGTCAGCTCCA  
ATTCCGGGGATCCGTCGACC  
B3368F TTGTTATACTGTAAGGATTGGGTAAAAGCGGCTGCGCATTATCCATTAAC  
GCGATTGTGTAGGCTGGAGCT  
B3368R TCATCGGATCCGGTAACCGATACTGCGCACCGTTTCGATAGCAATGGTGT  
ATTCCGGGGATCCGTCGACC  
B3389F ATGATCATGACCAGGAAATATGCCAATGTCAGGCAGGCTAACCGTCGTCT  
GCGATTGTGTAGGCTGGAGCT  
B3389R TTAAATGACCTCGGTTCATCGCGGTAAAGTTCAGAGATACGCAGGTACCTC  
ATTCCGGGGATCCGTCGACC  
B3390F ATGGAAGCACAAAAGTACAGCGTATTAATTGTGGACGATCATCCATTGTT  
GCGATTGTGTAGGCTGGAGCT  
B3390R TTAGCGACAGAATTCCAGCCAGAGTACGGTTGCCGCCACACGCGATCTGA  
ATTCCGGGGATCCGTCGACC  
B3495F ATGATCAAAGCATCAGCGCGACTGCTGCTGGTTCGATGATGACCCAGTTT  
GCGATTGTGTAGGCTGGAGCT  
B3495R TTATCCTTTGAAATCGGCCGCATCGAGTTCATGGCGAGACAACAGTTTAT  
ATTCCGGGGATCCGTCGACC

B3498F GTGAAGAAATGGCGTCTGTTTTCCCTGTTCCCTGCGCCAGCTGGTGCTGAT  
GCGATTGTGTAGGCTGGAGCT  
B3498R TTAGCTGCATGATTCTCCTTTGCCGGCGGGAGTATTAATTCAATACGGA  
ATTCCGGGGATCCGTCGACC  
B3742F ATGACCAAATACAGCCTGCGGGCACGCATGATGATTTTGATTCTGGCACC  
GCGATTGTGTAGGCTGGAGCT  
B3742R TTACAGCTTCAGCCGCTCTTTGGCCAGTCGTGCCACGTTATGCATTTGCTC  
CATGGTCCATATGAATATCCTCC  
B3962F ATGAACATCAGGAATAGTGAACACTCGTCCCGGCCATGGCCGGGACGGAG  
GCGATTGTGTAGGCTGGAGCT  
B3962R CTA CTGAGCAATAACCCGACCGGTGTTACGTTCAATAATTTGATGCGGT  
ATTCCGGGGATCCGTCGACC  
B3963F ATGGATAAAAATATTCGCCTGATGGTAGCGGACGACCATGTCATCATGCG  
GCGATTGTGTAGGCTGGAGCT  
B3963R CTAAGTTATCAGGCAATGACTAATGGCGTATTTACGATGTCCGCATTGG  
ATTCCGGGGATCCGTCGACC  
B3964F ATGCAATTTTCCGAGCGACAGGTGAGCGCGAGCAGTGAGCCGCTCAAATT  
GCGATTGTGTAGGCTGGAGCT  
B3964R TTATTCATAAATCTGCTTATTTTCATAAGCTTGTACAATAGGAATGGTTA  
ATTCCGGGGATCCGTCGACC  
B3995F ATGTTTCAGCGTATTGATTGTGCGATGACGAGCCGCTGGCCCGCGACAATCT  
GCGATTGTGTAGGCTGGAGCT  
B3995R TTATAGCCCGATGGCCTCCTTCAGGCTTTTCAGGTAGCGACGGCTCACCG  
ATTCCGGGGATCCGTCGACC  
B3996F ATGTACGAATTGAACTCAATTTTACTGCTGTTACAGCAGATGTGTGTGTT  
GCGATTGTGTAGGCTGGAGCT  
B3996R TCAATACGCTGAACATACTGGCTCCAGCGGCAGACGCAGAGTAATGCGGG  
ATTCCGGGGATCCGTCGACC  
Z117F GCCTGTCCCCGCATCTCTACCTGT  
Z117R ATGCTCAAATTCGGGTCTCCTGTT  
Z1215F CGGCTGTCGTTGATGCTGTTTCT  
Z1215R TGAGACGCACGGCATGAAGATTT  
Z1250F CAGCAGGGCGAATTCAGTGTC  
Z1250R CGGCAGCTGCACGGTGATACGAT  
Z1306F GCTGCGCGGTGCCAACA  
Z1306R CCGTGCCGATTATGCCGTGGAG  
Z1675F TGTACCCGCAGCAGGAGCAATAA  
Z1676R GCCATCAGGTTGCCAAGCGTATC  
Z1912F GTAATCAGGCCAAATCCGCAACAA  
Z1912R TGCCGATCACCGCGAGAAAATAG  
Z2074F GAAAGTCAGCGCAGCACAGGATG  
Z2074R CTGGAAAGCCCCGGACTAAAA  
Z2194F CGGGCGTGCACAGGTCGTA  
Z2195R GGCGGCAGTAGTGGTGTTGATAGC  
Z2198F TTACCCGTTATTTGCAGTTGTTCCG  
Z2198R TGGGTTACCGTCACGTCTATCTGC  
Z2323F CGTACTCAGGAAGTGCGTCA  
Z2323R ACCCTTTGTAACGCGCTTGCTGTC  
Z2324F AAGCAAATGACGCCGGCAAACACTAC  
Z2324R CCATTTAGCCAGGGTGAAAA

Z2361R TCGGAAAGGGCCTGGAAACAC  
Z2362F ACACTGACCTGGCCCCACCTACTT  
Z2651F CTGACAGCCGCGATGCCGTAAC  
Z2651R GCTGTGGGTGGAAAATGGCTAAAA  
Z2662F GTACCAGACGCGCCACACCTATG  
Z2662R GCGAGCCGGCAATGGACTTAGC  
Z270R ATCTGGCCCCGGCGTTTTATCA  
Z271F CGTGGTTATGCCGCTATTGTGTTG  
Z2946F CAGCAACCAGGTAGCGGTAT  
Z2946R TTGCCAGGCATTACAGAACA  
Z2986F CCGCTATTCCCTCAATCAAA  
Z2986R TAAGGTTCCCGGTAAAGTTGAA  
Z3113F CAGATTGCCGGCATTGAACACG  
Z3113R GCAGGCCACGCAAGCAACAGC  
Z3119F CGCTGCCACCACGCCCAATG  
Z3120R GCAGCGGCCGGAGAAAGCAGTG  
Z3205F GCCAACGCCCGACTGATTACAAG  
Z3206R GCCGGGAAGCGCTAAGTAACAGGT  
Z3207F GTTCGCCGCTAAGCCGTGGTCA  
Z3207R GAGAAAATCAGCGCGGGTGGTTAC  
Z3324F CTGTCCTTTTGCTGTCTGGCTTCC  
Z3324R CCGCCACCTTGATTGATGTCTTCC  
Z3327F AACCAACTTCACGCCACAGAGCAT  
Z3327R GGAGGGCGGCGAACTGTGAA  
Z3367R CGTTGCCGGCGCCTGACCTGTA  
Z3368F TGTGACCGTGGTGACCGCTACTTA  
Z3389F GCCCCGGACGTTCTTACCA  
Z3390R GCCCCTGTCCCTCGCTCACCATC  
Z3495R TCTGGCGACCGAATCCTTTGACTT  
Z3498F CGGACAAGCGCCATAACATTC  
Z355F CGCTGCGGTCTGTTCGTTTCG  
Z355R ACCGTGCACGCGAGTAAAACCATC  
Z3742F CGTTATTGTCTGGCGGGTCGTAC  
Z3742R CGTTACAGGAAGCAGCGGAGAATG  
Z3962F TCCCTACATTGCCCCCTGAAGATT  
Z3962R TGATAACCGGCGACAGCACATTC  
Z3963R AGGAATCTTCAGGGGGCAATGTAG  
Z3964F TGCCGTCTGGACACTGCCTCAA  
Z3995R CCTTTGCTGGCGGTGTTTTGCTAC  
Z3996F GATCGCCGCTGTCAGGGTATGTTG  
Z414F GTGAACGTGCTGGCGCTGAACCT  
Z414R CGCTACCCGCCACTTATGCTCA  
Z686R TTGCCGCGAATTCGTGATAGTCC  
Z687F GTTACTTTGCGCATCGTTCACTCC  
Z89F CGCGTTGCTTTTCGTACAGTTCT

|        |                                                      |
|--------|------------------------------------------------------|
| Z90R   | GCAGCCAGAAGCGGAAGAAGACG                              |
| Z955F  | ATGAGGTGATCGATGCCGTTTTTG                             |
| Z955R  | CCTTCTCAAACCAGCAGCGTCGTG                             |
| Km1    | CAGTCATAGCCGAATAGCCT                                 |
| Km2    | CGGTGCCCTGAATGAACTGC                                 |
| Cm1    | TTATACGCAAGGCGACAAGG                                 |
| Cm2    | GATCTTCCGTCACAGGTAGG                                 |
| ZR-F   | CTAG <u>GTCTAGA</u> AATCCTGCTGCGGTGAGTAGT (XbaI)     |
| ZR-R   | CCC <u>AAGCTT</u> CGGCGTTTTATCACCAACTT (Hind III)    |
| grrS-F | CTAG <u>GTCTAGA</u> CGTTATTGTCTGGCGGGTTCGTCAC (XbaI) |
| grrS-R | CCG <u>GAATTC</u> CGTTACAGGAAGCAGCGGAGAATG (EcoRI)   |
| grrA-F | TTAAGCATCAGCGTGACCAG                                 |
| grrA-R | GTATTCGCCTTTGGCATGTT                                 |
| flhD-F | CCG <u>GAATTC</u> CAAGGCTGAAATTTCCCAA (EcoRI)        |
| flhD-R | CGC <u>GGATCC</u> CAGAGCCAGAAGTCAGGCAGA (BamHI)      |
| fliA-F | CCG <u>GAATTC</u> TAAAGCACGTCTGTGGCATC (EcoRI)       |
| fliA-R | CGC <u>GGATCC</u> ACTCTCCAGGGGAACATCT (BamHI)        |
| amsG1  | CG <u>GGTACC</u> GTATCGCTTAAAGGGGAAACG (KpnI)        |
| amsG2  | CTAG <u>GTCTAG</u> ACACCTGGAAAGCCATTAATCA (XbaI)     |

---

<sup>a</sup> Underlined nucleotides are restriction sites added and the restriction enzymes are indicated at the end of primers.

## References

1. Yap MN, Yang C, Charkowski AO: **The response regulator HrpY of *Dickeya dadantii* 3937 regulates virulence genes not linked to the *hrp* cluster.** *Mol Plant-Microbe Interact* 2008, **21**: 304-314.
2. Kim D, Forst S: **Genomic analysis of the histidine kinase family in bacteria and archaea.** *Microbiology* 2001, **147**:1197-1212.
3. Galperin MY: **Structural classification of bacterial response regulators: Diversity of output domains and domain combinations.** *J Bacteriol* 2006, **188**:4169-4182.
